# Supplementary material for: Identification of pyroptosis-related genes and long non-coding RNAs signatures in osteosarcoma
Source: Cancer Cell Int. 2022 Oct 16;22:322. doi: 10.1186/s12935-022-02729-1 (PMC9575257; doi:10.1186/s12935-022-02729-1)
Supplement: Supplementary file 2 — Additional file 2: Table S3. The 57 PRGs [file 12935_2022_2729_MOESM2_ESM.xlsx]

## Sheet: Sheet1
AIM2
CASP1
CASP3
CASP4
CASP5
CASP6
CASP8
CASP9
ELANE
GPX4
GSDMA
GSDMB
GSDMC
GSDMD
GSDME
IL18
IL1B
IL6
NLRC4
NLRP1
NLRP2
NLRP3
NLRP6
NLRP7
NOD1
NOD2
PJVK
PLCG1
PRKACA
PYCARD
SCAF11
TIRAP
TNF
APIP
DHX9
GZMA
GZMB
NAIP
NLRP9
ZBP1
BAK1
BAX
CHMP2A
CHMP2B
CHMP3
CHMP4A
CHMP4B
CHMP4C
CHMP6
CHMP7
CYCS
HMGB1
IL1A
IRF1
IRF2
TP53
TP63
